# Supplementary material for: CaGe: A Web-Based Cancer Gene Annotation System for Cancer Genomics
Source: PubMed Central journal article supplement — Genomics Inform. 2012 Mar 31;10(1):33–9. doi: 10.5808/GI.2012.10.1.33 (PMC3475486; doi:10.5808/gi.2012.10.1.33), 2012-03-31
Supplement: gni-10-33-s001.pdf [file gni-10-33-s001.pdf]

## **SUPPLEMENTARY INFORMATION**

### **CaGe: A Web-Based Cancer Gene Annotation System for Cancer Genomics**

**Young-Kyu Park<sup>1,2</sup>, Tae-Wook Kang<sup>1</sup>, Su-Jin Baek<sup>1,3</sup>, Kwon-Il Kim<sup>2</sup>, Seon-Young Kim<sup>1,3</sup>,  
Doheon Lee<sup>2\*</sup> and Yong Sung Kim<sup>1,3\*\*</sup>**

<sup>1</sup>**Medical Genomics Research Center, KRIBB, Daejeon 305-806, Korea,**

<sup>2</sup>**Department of Bio and Brain Engineering, KAIST, Daejeon 305-701, Korea,**

<sup>3</sup>**Department of Functional Genomics, University of Science and Technology, Daejeon 305-806, Korea**



|                              |        |   |   |                   |              |     |                                                                                                                                                                                                                                                                                                                                                                                                                                                                                                                                                                                                                                                                                                                                                                                                                                                                                                                                                                                                                                                                                                                                                                                                                                                                                                                                                                                                                                                                                                                                                                                                                                                                                                                                                                                                                                                                                                                                          |                                                                                                                                                                                                                                                                                                                                                                                                                                                                                                                                                                                                                                                                                                                                                                                  |
|------------------------------|--------|---|---|-------------------|--------------|-----|------------------------------------------------------------------------------------------------------------------------------------------------------------------------------------------------------------------------------------------------------------------------------------------------------------------------------------------------------------------------------------------------------------------------------------------------------------------------------------------------------------------------------------------------------------------------------------------------------------------------------------------------------------------------------------------------------------------------------------------------------------------------------------------------------------------------------------------------------------------------------------------------------------------------------------------------------------------------------------------------------------------------------------------------------------------------------------------------------------------------------------------------------------------------------------------------------------------------------------------------------------------------------------------------------------------------------------------------------------------------------------------------------------------------------------------------------------------------------------------------------------------------------------------------------------------------------------------------------------------------------------------------------------------------------------------------------------------------------------------------------------------------------------------------------------------------------------------------------------------------------------------------------------------------------------------|----------------------------------------------------------------------------------------------------------------------------------------------------------------------------------------------------------------------------------------------------------------------------------------------------------------------------------------------------------------------------------------------------------------------------------------------------------------------------------------------------------------------------------------------------------------------------------------------------------------------------------------------------------------------------------------------------------------------------------------------------------------------------------|
| chr15:31723854.CA.uc001zh.1  | Q15413 | L | I | possibly damaging | RYR3         | CGI | astrocytoma;brain tumors;                                                                                                                                                                                                                                                                                                                                                                                                                                                                                                                                                                                                                                                                                                                                                                                                                                                                                                                                                                                                                                                                                                                                                                                                                                                                                                                                                                                                                                                                                                                                                                                                                                                                                                                                                                                                                                                                                                                | 15451620;9395096;                                                                                                                                                                                                                                                                                                                                                                                                                                                                                                                                                                                                                                                                                                                                                                |
| chr15:79372030.AG.uc010bq.1  | B7WVK7 | H | R | possibly damaging | <b>IL16</b>  | CGI | acute leukemia; aids-associated burkitt&amp;papovs lymphoma;b-cell lymphoma;burkitt&amp;papovs lymphoma;cancer;cancer diseases;crohn&amp;papovs disease;cutaneous t-cell lymphoma;ibd;inflammatory bowel disease;leukemia;lung cancer;malignancy;mf;multiple myeloma;mycosis fungoides;pleomorphic t-cell lymphoma;primary tumor;tumor;tumor;                                                                                                                                                                                                                                                                                                                                                                                                                                                                                                                                                                                                                                                                                                                                                                                                                                                                                                                                                                                                                                                                                                                                                                                                                                                                                                                                                                                                                                                                                                                                                                                            | 10662046;10949545;1040184;11154979;11171821;11293814;11709502;11709514;11859968;12191564;12528894;12706406;12769791;14597213;14755377;14760748;15165404;15174966;15802332;2934199;                                                                                                                                                                                                                                                                                                                                                                                                                                                                                                                                                                                               |
| chr17:1524580.TC.uc002fe.1   | Q6P2Q9 | N | D | probably damaging | PRPF8        | CGI | -                                                                                                                                                                                                                                                                                                                                                                                                                                                                                                                                                                                                                                                                                                                                                                                                                                                                                                                                                                                                                                                                                                                                                                                                                                                                                                                                                                                                                                                                                                                                                                                                                                                                                                                                                                                                                                                                                                                                        |                                                                                                                                                                                                                                                                                                                                                                                                                                                                                                                                                                                                                                                                                                                                                                                  |
| chr18:27306296.GT.uc002kws.1 | P32926 | G | V | probably damaging | DSG3         | CGI | Human;cancers;carcinoma;carcinomas;cyst;cysts;epidermal inclusion cysts;human squamous cell carcinoma;papillomas;squamous carcinoma;squamous cell carcinomas of the skin;squamous-cell carcinoma;tumor;tumors;tumours;                                                                                                                                                                                                                                                                                                                                                                                                                                                                                                                                                                                                                                                                                                                                                                                                                                                                                                                                                                                                                                                                                                                                                                                                                                                                                                                                                                                                                                                                                                                                                                                                                                                                                                                   | 10427986;12787134;15781625;16120143;2260885;2404575;7533999;8641550;8891017;8982400;9376722;9511724;9705163;9886266;                                                                                                                                                                                                                                                                                                                                                                                                                                                                                                                                                                                                                                                             |
| chr20:40310741.CA.uc010ggj.1 | O14522 | R | I | possibly damaging | PTPRT        | CGI | astrocytoma;cancer;cancers;colorectal cancers;gastric cancers;glial tumors;glioma;human pancreatic adenocarcinoma;lymphoma;                                                                                                                                                                                                                                                                                                                                                                                                                                                                                                                                                                                                                                                                                                                                                                                                                                                                                                                                                                                                                                                                                                                                                                                                                                                                                                                                                                                                                                                                                                                                                                                                                                                                                                                                                                                                              | 10395944;12501215;14692702;15155950;9524099;                                                                                                                                                                                                                                                                                                                                                                                                                                                                                                                                                                                                                                                                                                                                     |
| chr21:27132692.CA.uc002ymf.1 | Q9UHB8 | C | F | probably damaging | ADAMT S1     | CGI | breast carcinoma;cancer;colon adenocarcinoma;fibrosarcoma;hct;hepatocellular carcinoma (hcc);hyperplasia;lymph-node metastasis;metastasis;ovarian tumors;pancreatic cancer;prostate cancer;solid tumor;tumor;tumor metastasis;tumour;umr-106 osteosarcoma;                                                                                                                                                                                                                                                                                                                                                                                                                                                                                                                                                                                                                                                                                                                                                                                                                                                                                                                                                                                                                                                                                                                                                                                                                                                                                                                                                                                                                                                                                                                                                                                                                                                                               | 10376599;10811842;11108265;11705860;12716911;15073121;15194513;15539621;15599946;15625312;15967414;15972109;3470543;                                                                                                                                                                                                                                                                                                                                                                                                                                                                                                                                                                                                                                                             |
| chr21:39108096.AG.uc002yqg.1 | P15036 | T | A | probably damaging | <b>ETS2</b>  | CGI | Human/Mouse/Rat/others: acute myelogenous leukemia (aml);acute myeloid leukemia; acute nonlymphoblastic leukemia;adenocarcinoma;adenoma;adenomas;adult t-cell leukemia;advanced carcinoma;antiastrocytoma;atypical adenomatous hyperplasia;blast crisis;breast cancer;breast cancers;breast carcinoma;breast carcinomas;breast tumor;cancer;cancers;carcinogenesis;carcinoma;carcinomas;cervical carcinoma;choriocarcinoma;chronic myeloid leukemia;cmr;colonic adenocarcinoma;colonic adenocarcinomas;colonic neoplasms;esophageal squamous cell carcinoma;esophageal squamous cell carcinoma (escc);esophageal squamous-cell carcinoma;esophageal squamous-cell carcinoma (escc);glioblastoma;hct;head and neck cancer;head and neck tumors;hepatocarcinogenesis;hepatocellular carcinoma (hcc);hepatocellular carcinoma;human breast cancer;human breast carcinoma;human hepatocellular carcinoma;human leukemia;human leukemias;human ovarian cancer;human prostate cancer;human t cell leukemia;human tumor;hyperplastic;hyperplastic polypl;hyperplastic polyps;intrahepatic metastasis;invasive squamous cell carcinoma;large tumors;leukemia;leukemias;leukemogenesis;lung adenoma;lung carcinoma;lymph node metastasis;lymph-node metastasis;malignant transformation;mammary tumors;megakaryoblastic leukemias;metaplasia;metastasis;mouse mammary tumor;mouse mammary tumor;myelomonocytic leukemia;neoplasia;neuroblastoma;non-small cell lung cancer;oncogene;oncogenesis;oncogenes;oncogenes;oncoproteins;oncoproteins;ovarian cancer;ovarian carcinoma;ovarian tumor;pancreatic adenocarcinoma;pancreatic cancer;pancreatic carcinoma;primary hepatocellular carcinoma (phc);prostate cancer;prostate tumor;serous ovarian cancer;small lung carcinoma;squamous cell cancer (scc);squamous cell carcinoma;squamous cell carcinoma of the uterine cervix;squamous-cell carcinoma;tumor;tumorigenesis;tumor;tumour;tumours; | 10212281;10485465;10524199;11114728;11334730;11689681;12066221;12095911;12168840;12174931;12438253;12511603;12532432;12554679;12560478;12600747;12628005;12637947;12646185;12659820;12471933;12846561;14500366;14516794;14612405;14647414;14990565;15007164;15027271;15314206;15387369;15637174;815674348;15788656;15806151;16007139;16140924;16240325;16388024;16393289;16533023;16535922;16553541;17063131;17445509;17289954;17412166;17413831;7666753;1888697;1964597;2045100;2149958;2189104;2209540;2216458;2250910;2529204;2536061;2539641;2694094;2882955;3062367;3267212;3276571;3289683;3467145;347202;3941901;7523384;7848100;7937106;8183549;8445738;8527399;8620444;8626480;8649821;8660103;9111309;9122038;9174050;9285565;9303349;9500466;9605774;9639404;9879994; |
| chrX:115217787.AG.uc010nhq.1 | P50052 | K | E | probably damaging | <b>AGTR2</b> | CGI | Human/Mouse/Rat: adrenal adenomas;adrenal pheochromocytoma;adrenal tumor;adrenal tumour;basal cell carcinoma (bcc);basal-cell carcinoma (bcc);bce;ecrine poroma;leiomyoma;lobular adenocarcinoma;lung cancer;lung tumors;murine neuroblastoma;pheochromocytoma;pituitary adenomas;rat pituitary tumor;rat pituitary tumors;renal cell carcinoma;renal-cell carcinoma;tumorigenesis;uterine leiomyoma;                                                                                                                                                                                                                                                                                                                                                                                                                                                                                                                                                                                                                                                                                                                                                                                                                                                                                                                                                                                                                                                                                                                                                                                                                                                                                                                                                                                                                                                                                                                                    | 11422040;11546977;12174099;16140932;16977796;7716270;8189220;8254815;8389152;8552595;8954043;9105676;9332716;9761377;9863625;                                                                                                                                                                                                                                                                                                                                                                                                                                                                                                                                                                                                                                                    |

\* Genes in **red symbols**: previously reported SCLC genes; genes in **bold symbols**: previously reported lung cancer genes.

## Supplementary Table 2. Annotated genes in cancer pathways for the mutations from small cell lung cancer study

| <b>Mutation</b>              | <b>Gene</b> | <b>Pathway set</b> | <b>Pathway name</b>                          | <b>Previously reported</b> |
|------------------------------|-------------|--------------------|----------------------------------------------|----------------------------|
| chr1:112100232.GT.uc001ebs.1 | DDX20       | CGI_PATH           | METS affect on macrophage differentiation    | -                          |
| chr1:174926040.CA.uc001gky.1 | PAPPA2      | CGI_PATH           | Genes involved in diabetes pathways          | -                          |
| chr1:246856769.CA.uc001ier.1 | OR2T11      | CGI_PATH           | Olfactory transduction                       | -                          |
| chr2:136286937.AT.uc002tuu.1 | LCT         | CGI_PATH           | Galactose metabolism                         | Yes                        |
| chr3:131611592.GA.uc010htj.1 | COL6A5      | CGI_PATH           | Genes involved in axon guidance              | -                          |
| chr4:157951608.AG.uc003iph.1 | PDGFC       | CGI_PATH           | Cytokine-cytokine receptor interaction       | Yes                        |
| chr6:56674655.TC.uc003pcz.2  | DST         | CGI_PATH           | Genes involved in cell junction organization | Yes                        |
| chr6:132901495.GT.uc003qdh.1 | TAAR9       | CGI_PATH           | Neuroactive ligand-receptor interaction      | -                          |
| chr7:158528524.GT.uc003woh.1 | VIPR2       | CGI_PATH           | Neuroactive ligand-receptor interaction      | -                          |
| chr9:90846857.GT.uc004aqq.1  | SHC3        | CGI_PATH           | ErbB signaling pathway                       | Yes                        |
| chr10:96437955.AG.uc001kfw.2 | CYP2C18     | CGI_PATH           | Arachidonic acid metabolism                  | -                          |
| chr12:73887452.CA.uc001sxe.1 | KCNC2       | CGI_PATH           | Genes involved in diabetes pathways          | Yes                        |
| chr13:47935878.GT.uc001vcb.1 | RB1         | CGI_PATH           | Cell cycle                                   | Yes                        |
| chr14:64323330.GC.uc001xht.1 | SPTB        | CGI_PATH           | Genes involved in axon guidance              | -                          |
| chr15:26105373.GC.uc001zbi.1 | HERC2       | CGI_PATH           | Ubiquitin mediated proteolysis               | -                          |
| chr15:31723854.CA.uc001zhi.1 | RYR3        | CGI_PATH           | Calcium signaling pathway                    | Yes                        |
| chr15:46821163.GT.uc001zwy.1 | CEP152      | CGI_PATH           | Genes involved in cell cycle, mitotic        | -                          |
| chr15:79372030.AG.uc010blq.1 | IL16        | CGI_PATH           | Cytokine network                             | Yes                        |
| chr17:1524580.TC.uc002fte.1  | PRPF8       | CGI_PATH           | Spliceosome                                  | Yes                        |
| chr18:22223866.GT.uc002kvu.2 | TAF4B       | CGI_PATH           | Basal transcription factors                  | -                          |
| chr18:27306296.GT.uc002kws.1 | DSG3        | CGI_PATH           | Genes involved in apoptosis                  | Yes                        |
| chr21:39108096.AG.uc002yxx.1 | ETS2        | CGI_PATH           | Dorso-ventral axis formation                 | Yes                        |
| chrX:115217787.AG.uc010nqh.1 | AGTR2       | CGI_PATH           | Neuroactive ligand-receptor interaction      | Yes                        |
